# Supplementary material for: Socio-Economic Position Has No Effect on Improvement in Health-Related Quality of Life and Patient Satisfaction in Total Hip and Knee Replacement: A Cohort Study
Source: PubMed Central journal article supplement (PMC3592876; doi:10.1371/journal.pone.0056785), 2013-03-08

# Improvement in Physical Functioning in Time, per Highest Completed Level of Schooling

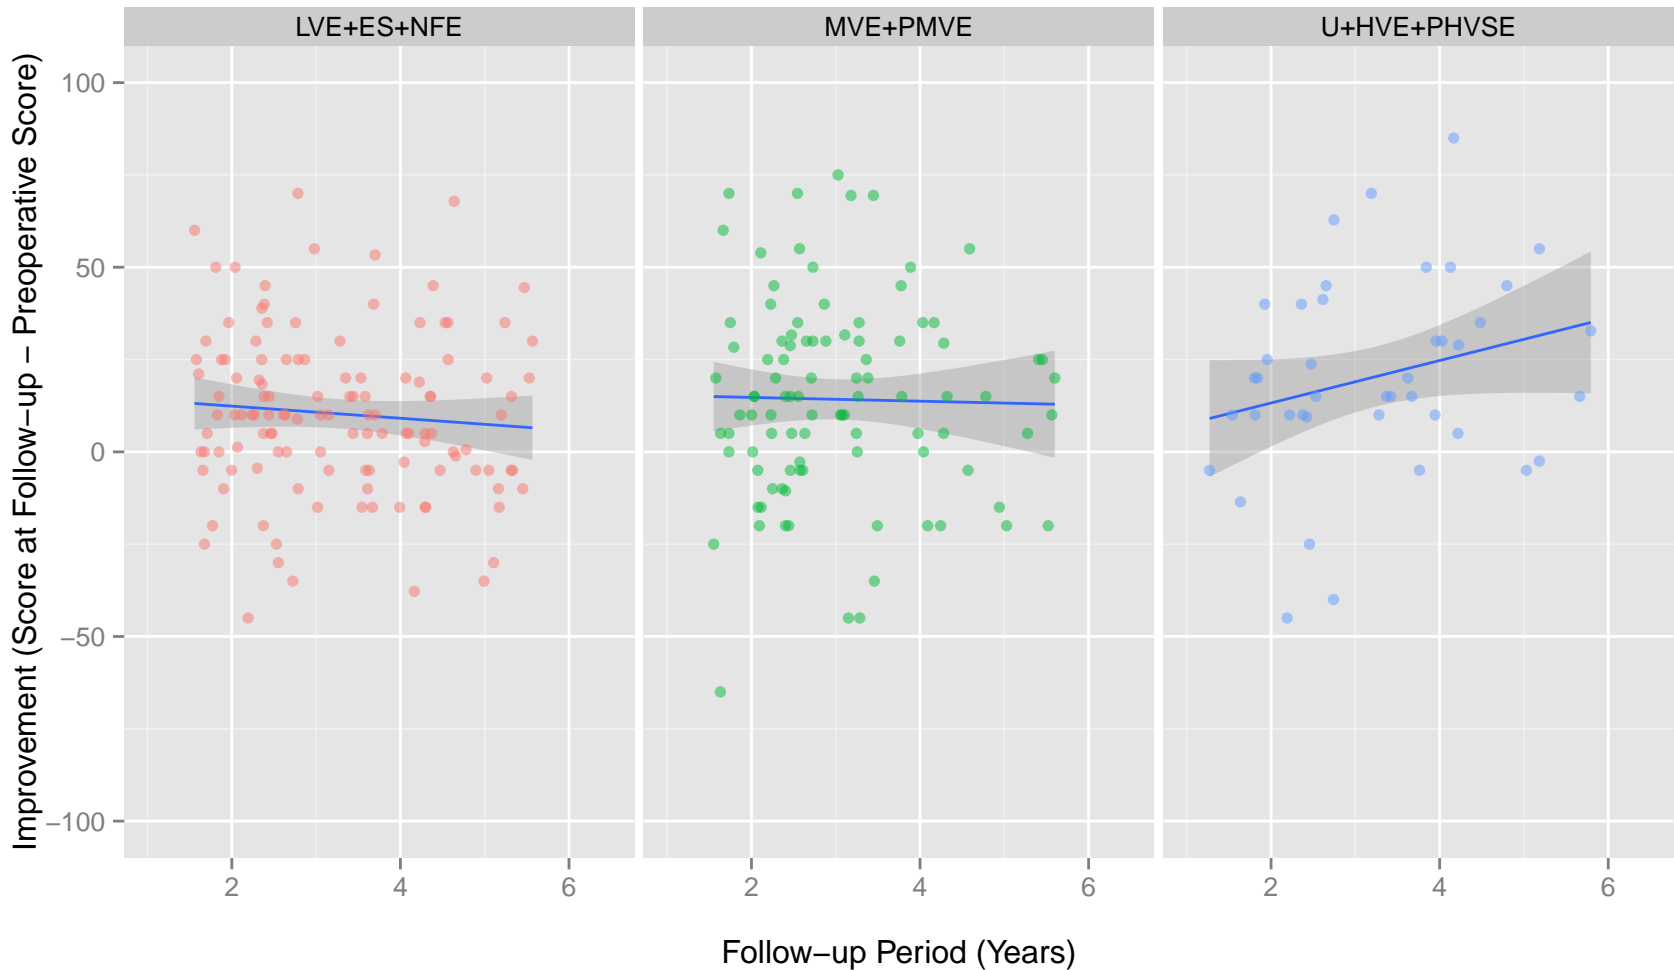

# Improvement in Role-Physical in Time, per Highest Completed Level of Schooling

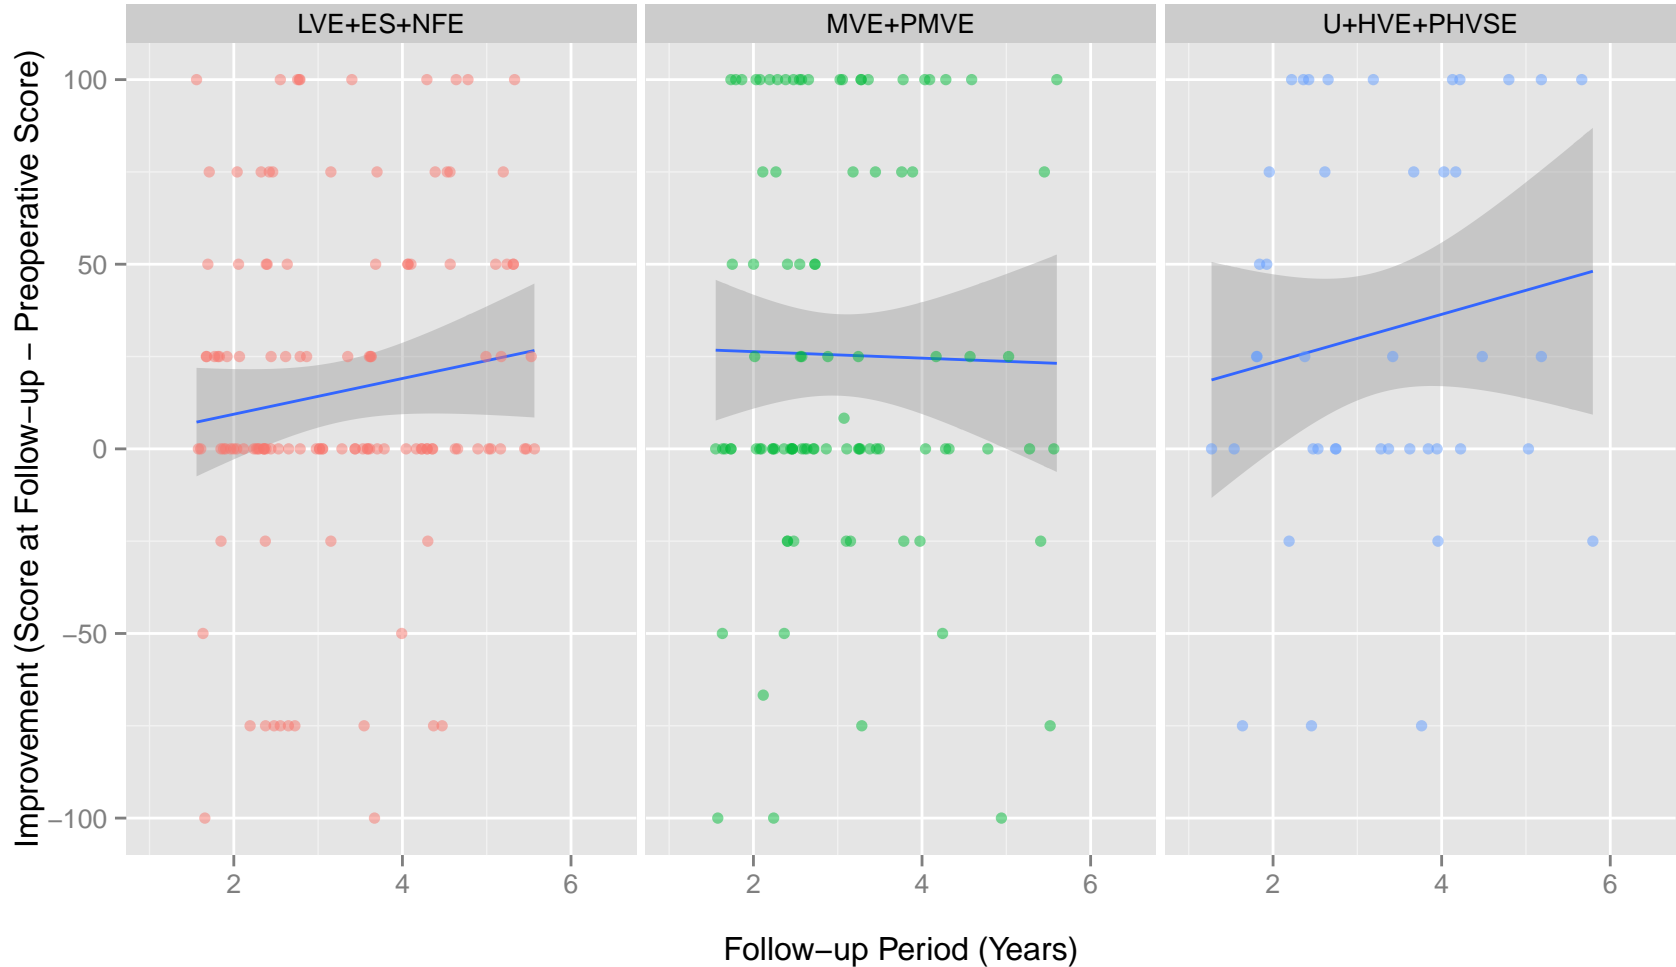

# Improvement in Bodily Pain in Time, per Highest Completed Level of Schooling

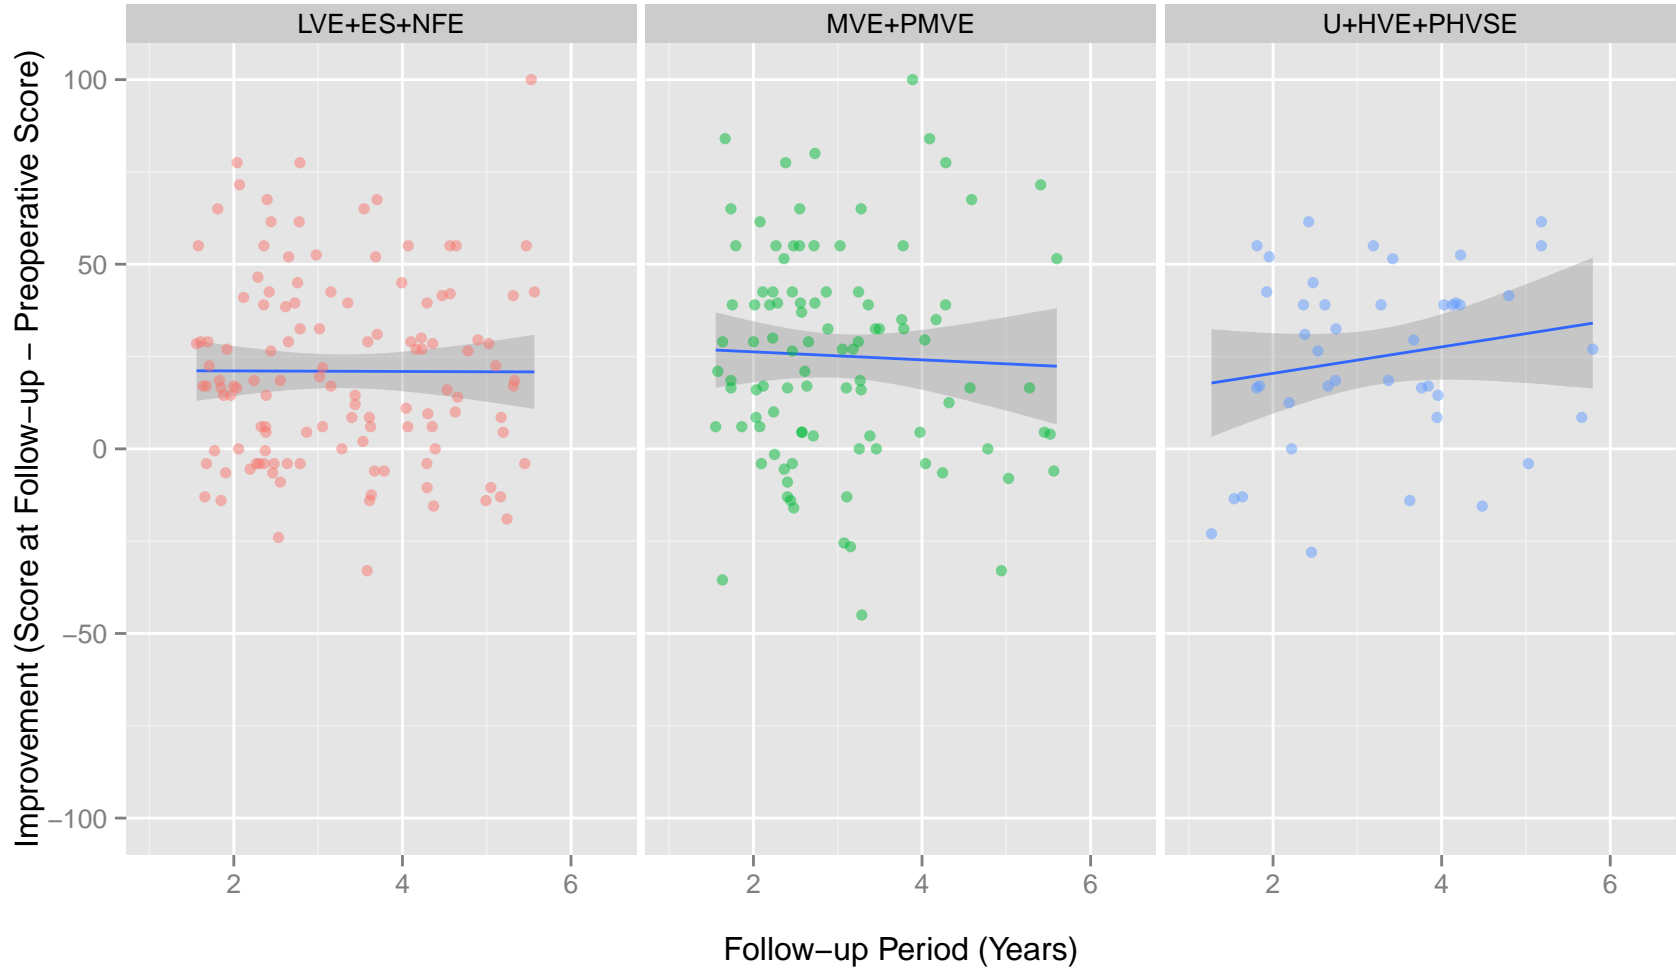

# Improvement in General Health in Time, per Highest Completed Level of Schooling

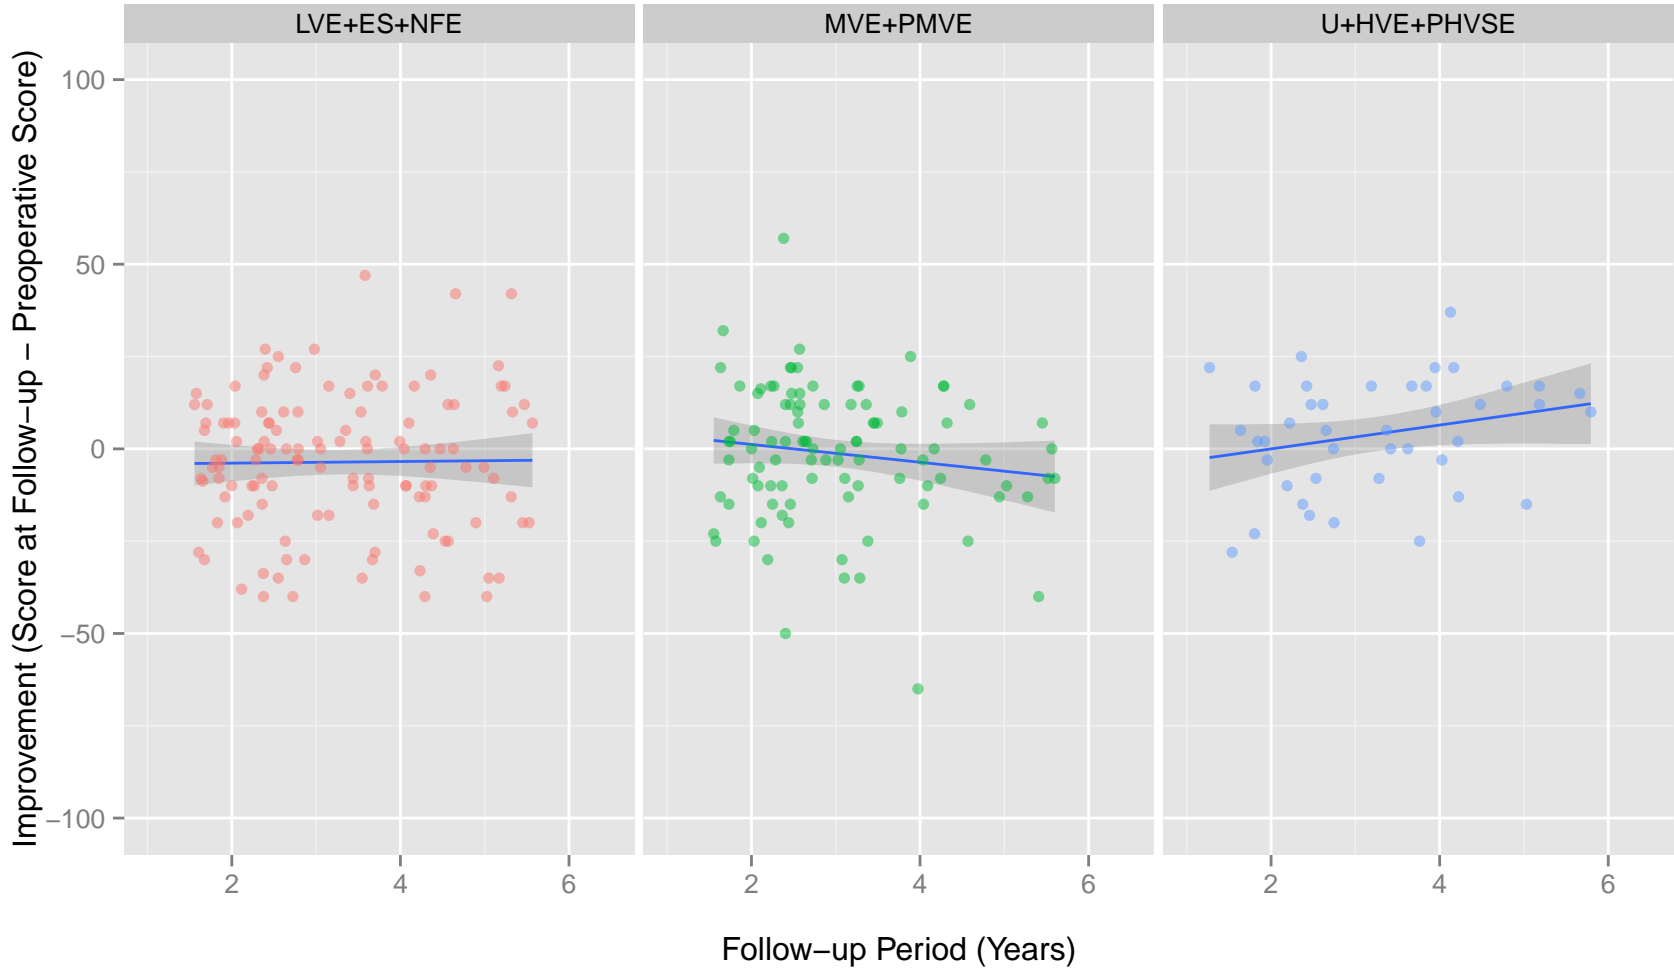

# Improvement in Vitality in Time, per Highest Completed Level of Schooling

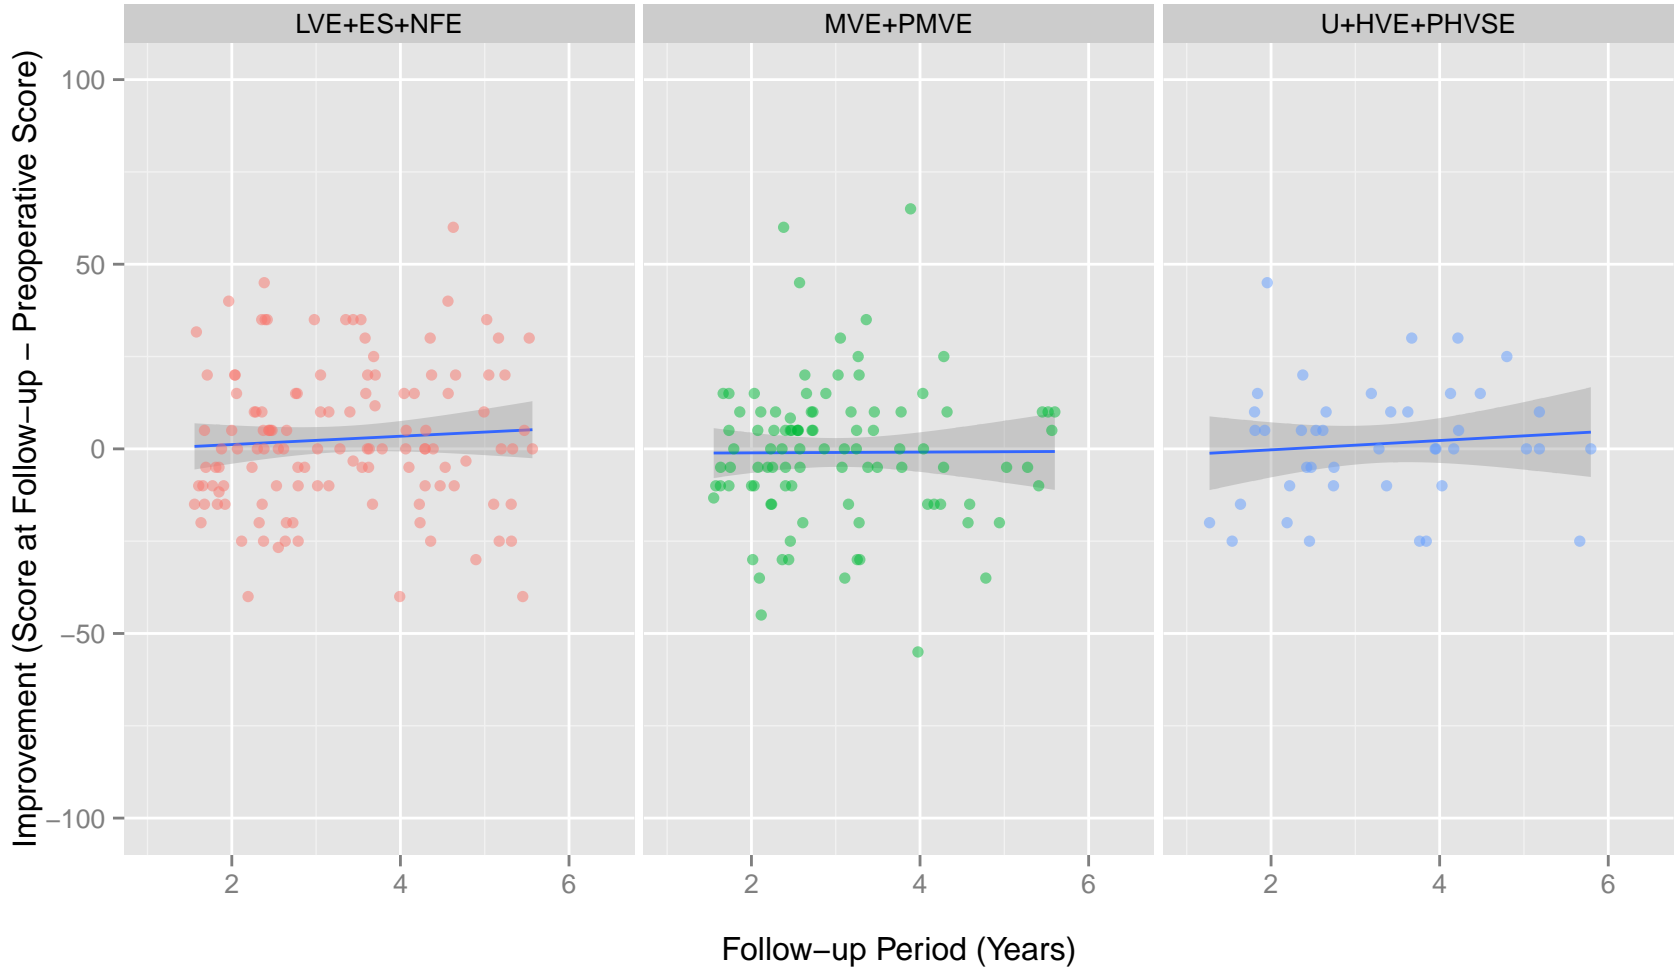

# Improvement in Social Functioning in Time, per Highest Completed Level of Schooling

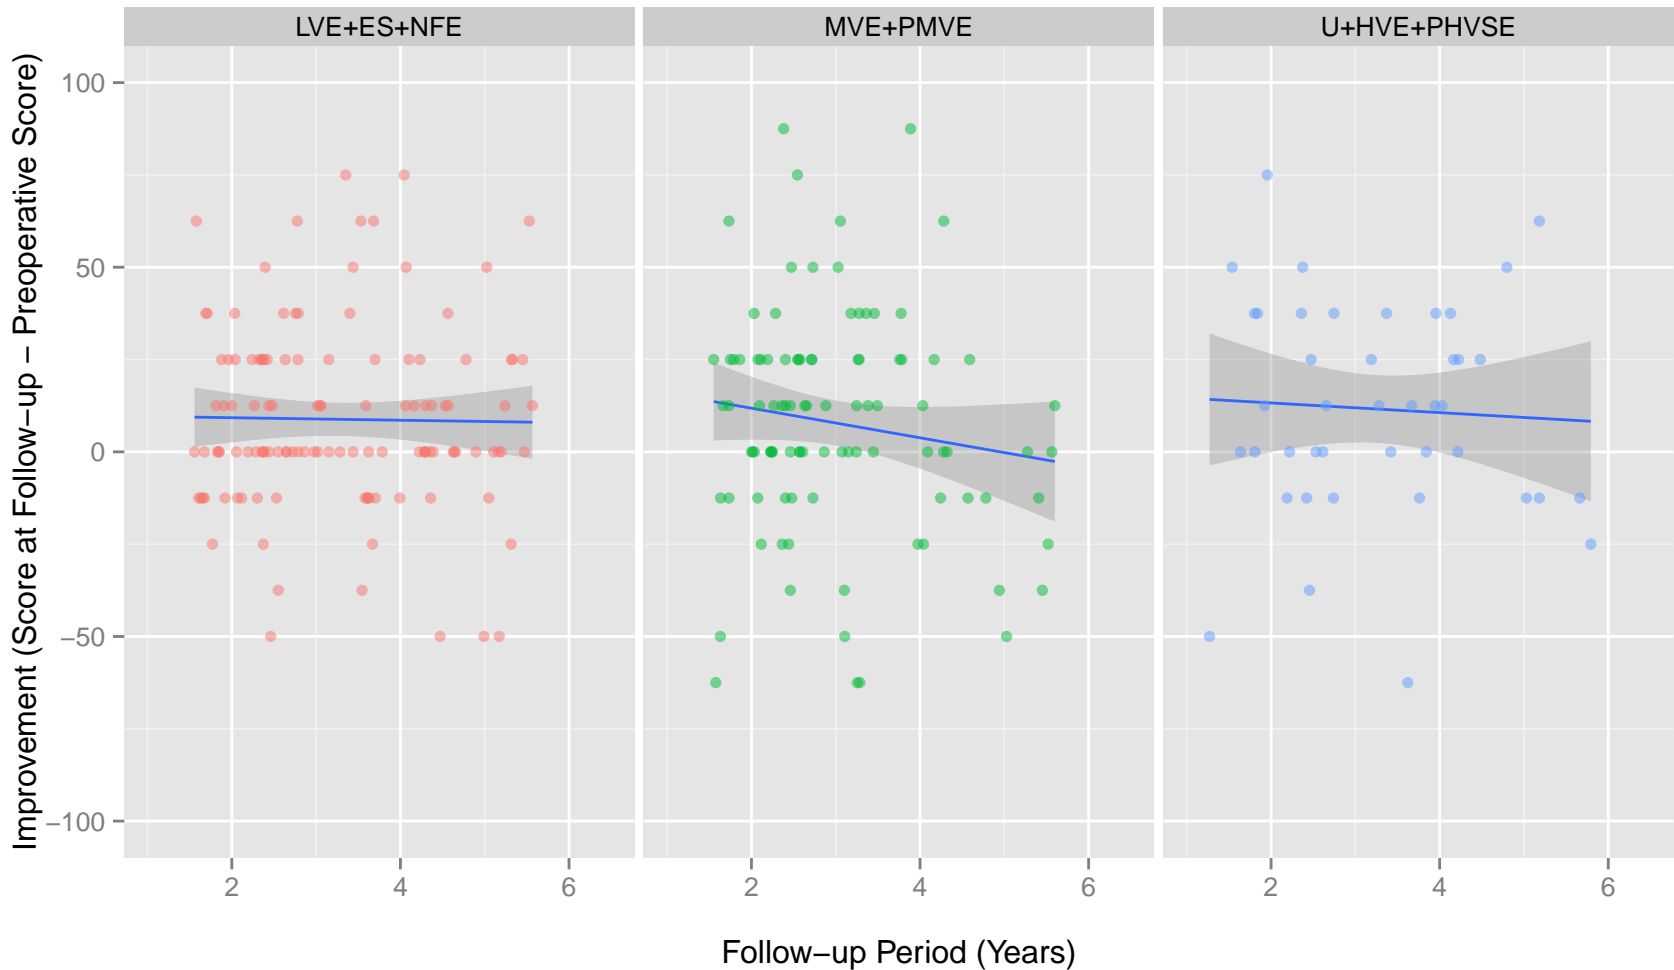

# Improvement in Role-Emotional in Time, per Highest Completed Level of Schooling

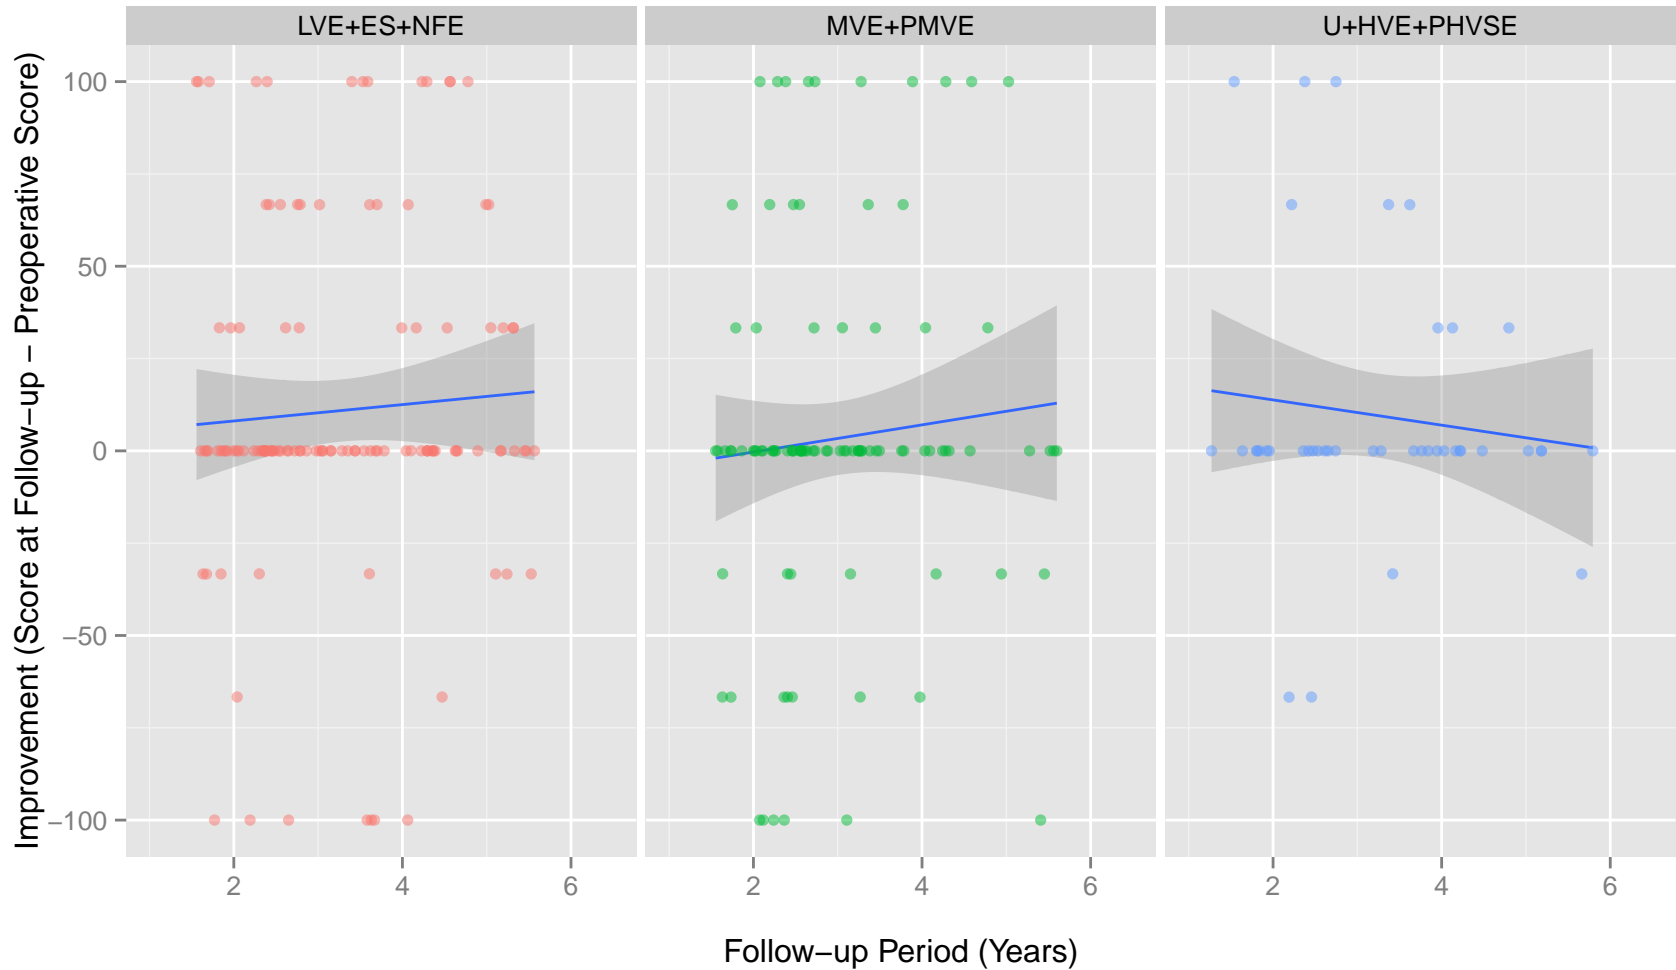

# Improvement in Mental Health in Time, per Highest Completed Level of Schooling

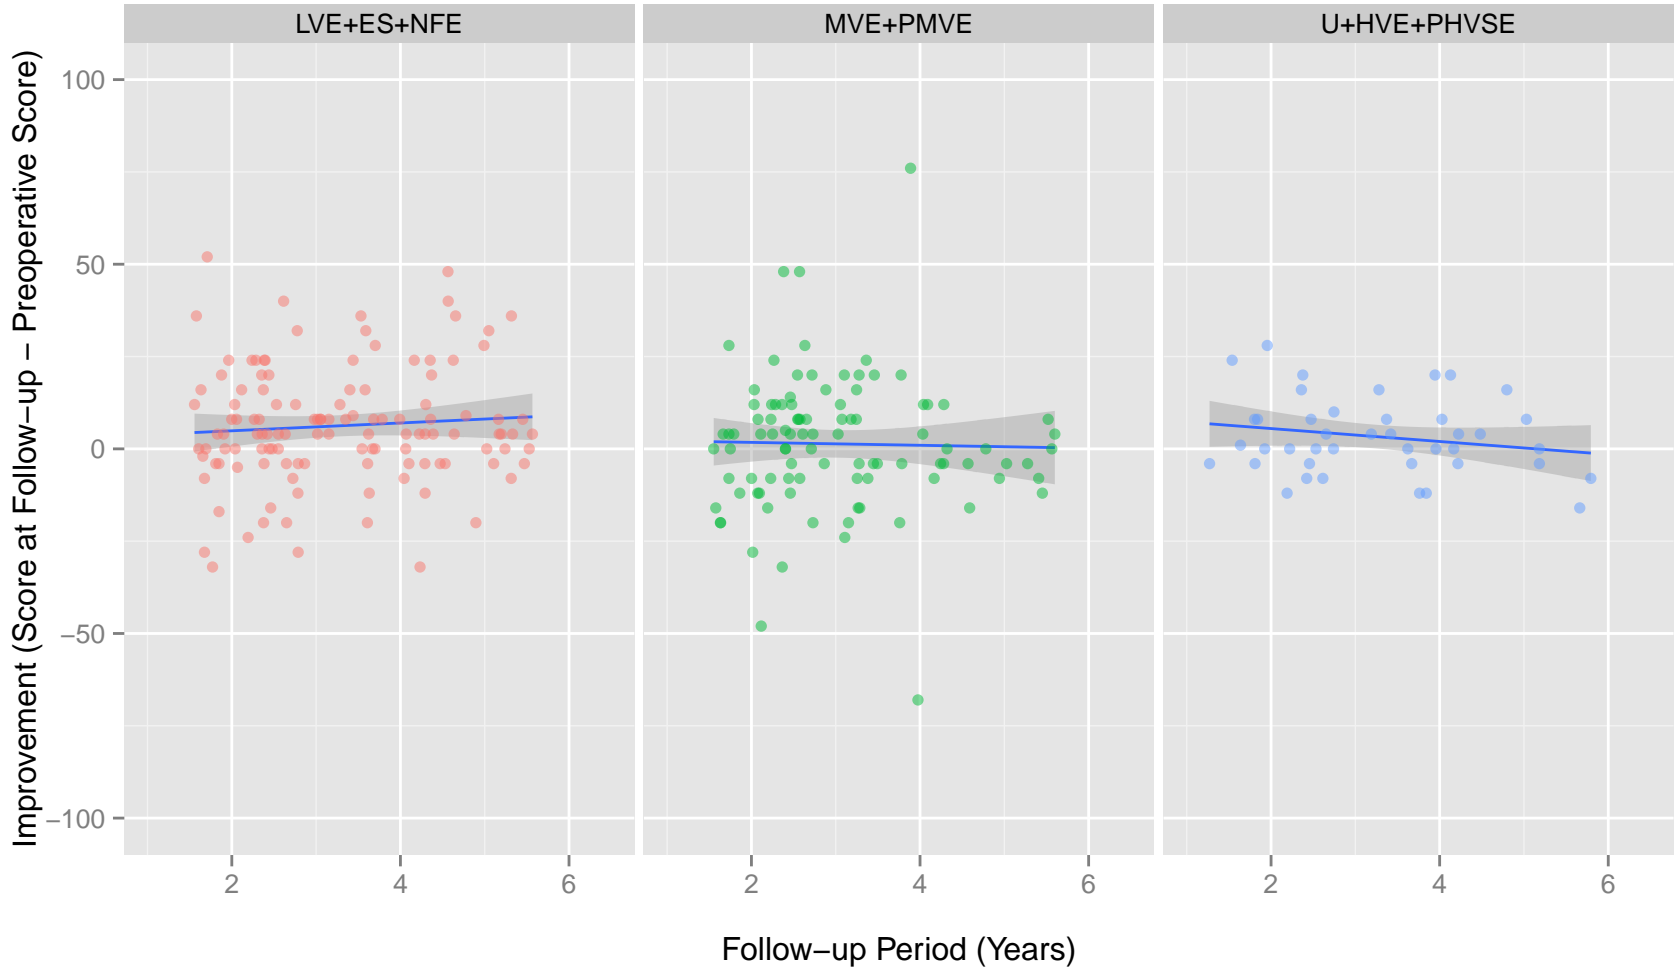



# Improvement in Physical Component Summary in Time, per Highest Completed Level of Schooling

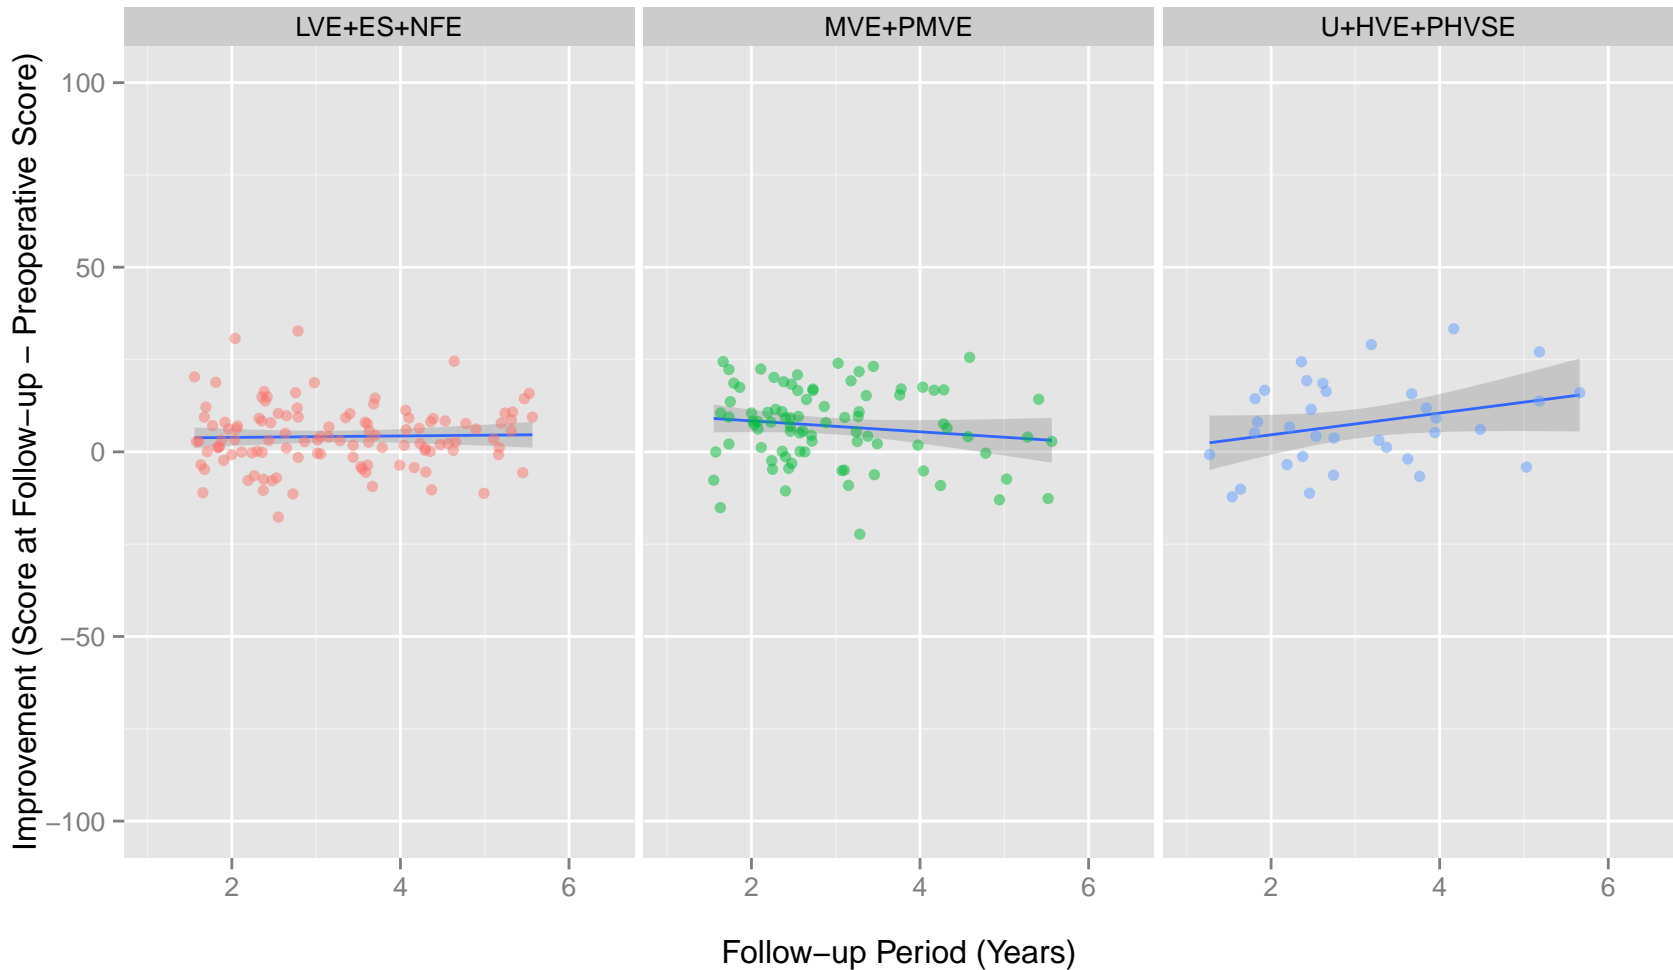

# Improvement in Mental Component Summary in Time, per Highest Completed Level of Schooling

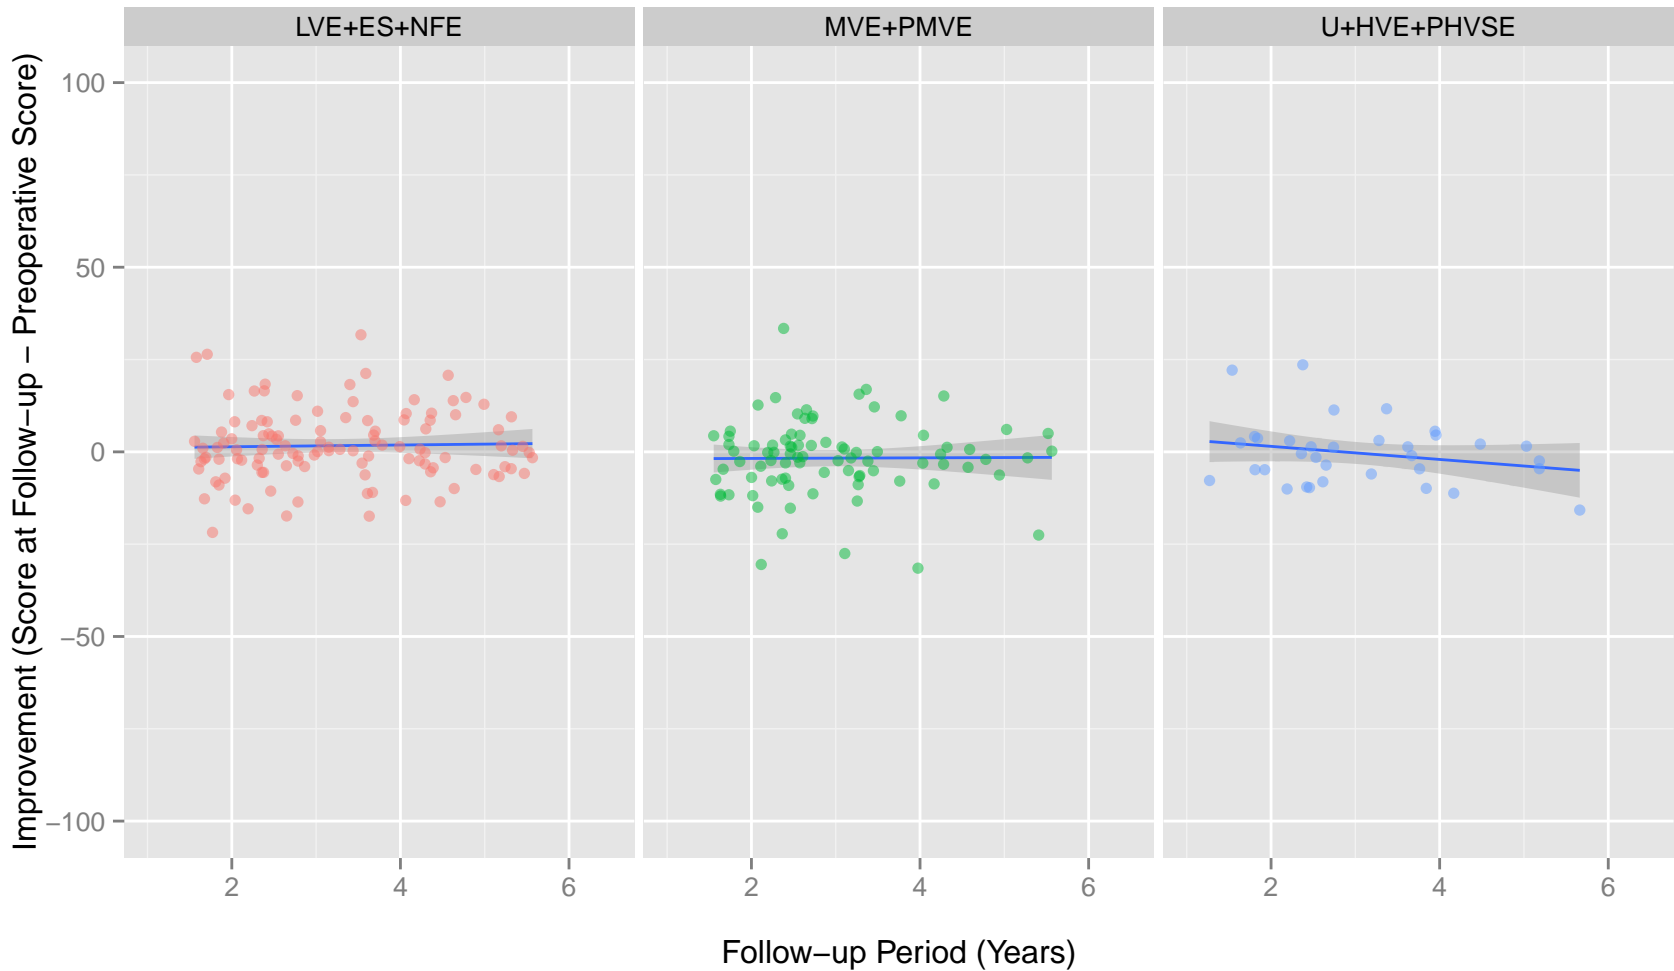

Supplement: pone.0056785.s002.pdf [file pone.0056785.s002.pdf]
