# Supplementary material for: Socio-Economic Position Has No Effect on Improvement in Health-Related Quality of Life and Patient Satisfaction in Total Hip and Knee Replacement: A Cohort Study
Source: PubMed Central journal article supplement (PMC3592876; doi:10.1371/journal.pone.0056785), 2013-03-08

# Satisfaction with Surgical Results, per Highest Completed Level of Schooling

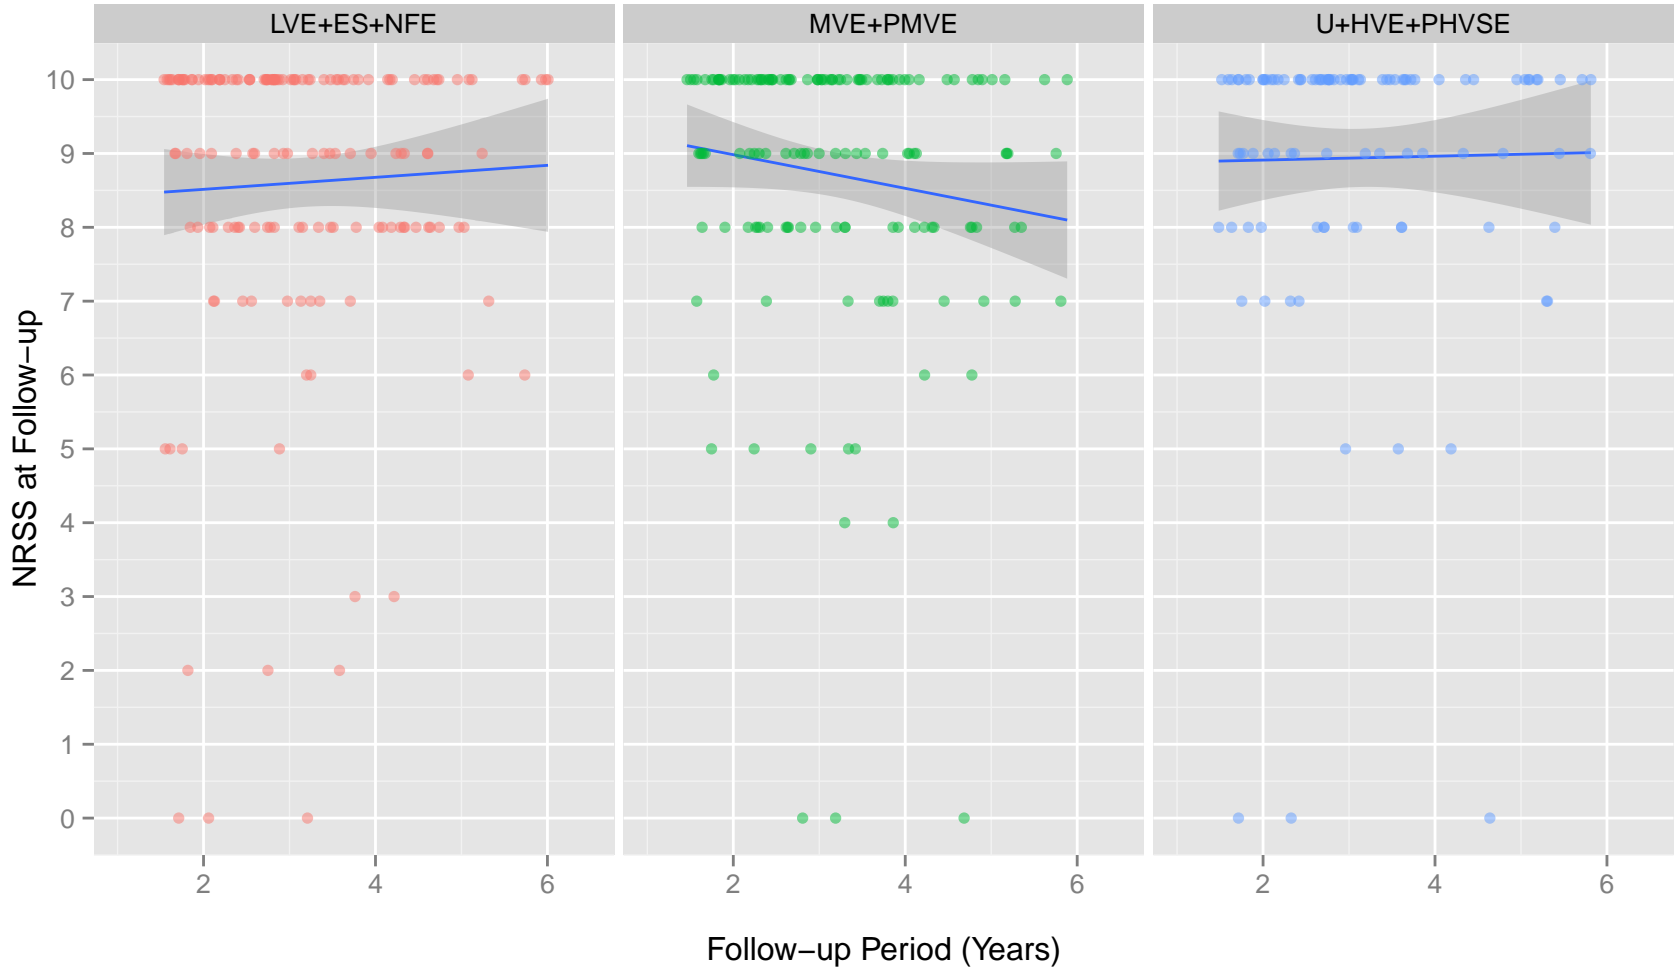

Supplement: pone.0056785.s003.pdf [file pone.0056785.s003.pdf]
