# Supplementary material for: Socio-Economic Position Has No Effect on Improvement in Health-Related Quality of Life and Patient Satisfaction in Total Hip and Knee Replacement: A Cohort Study
Source: PLOS journal article supplement (doi:10.1371/journal.pone.0056785), 2013-03-08

Improvement in Physical Functioning in Time,  
per Highest Completed Level of Schooling

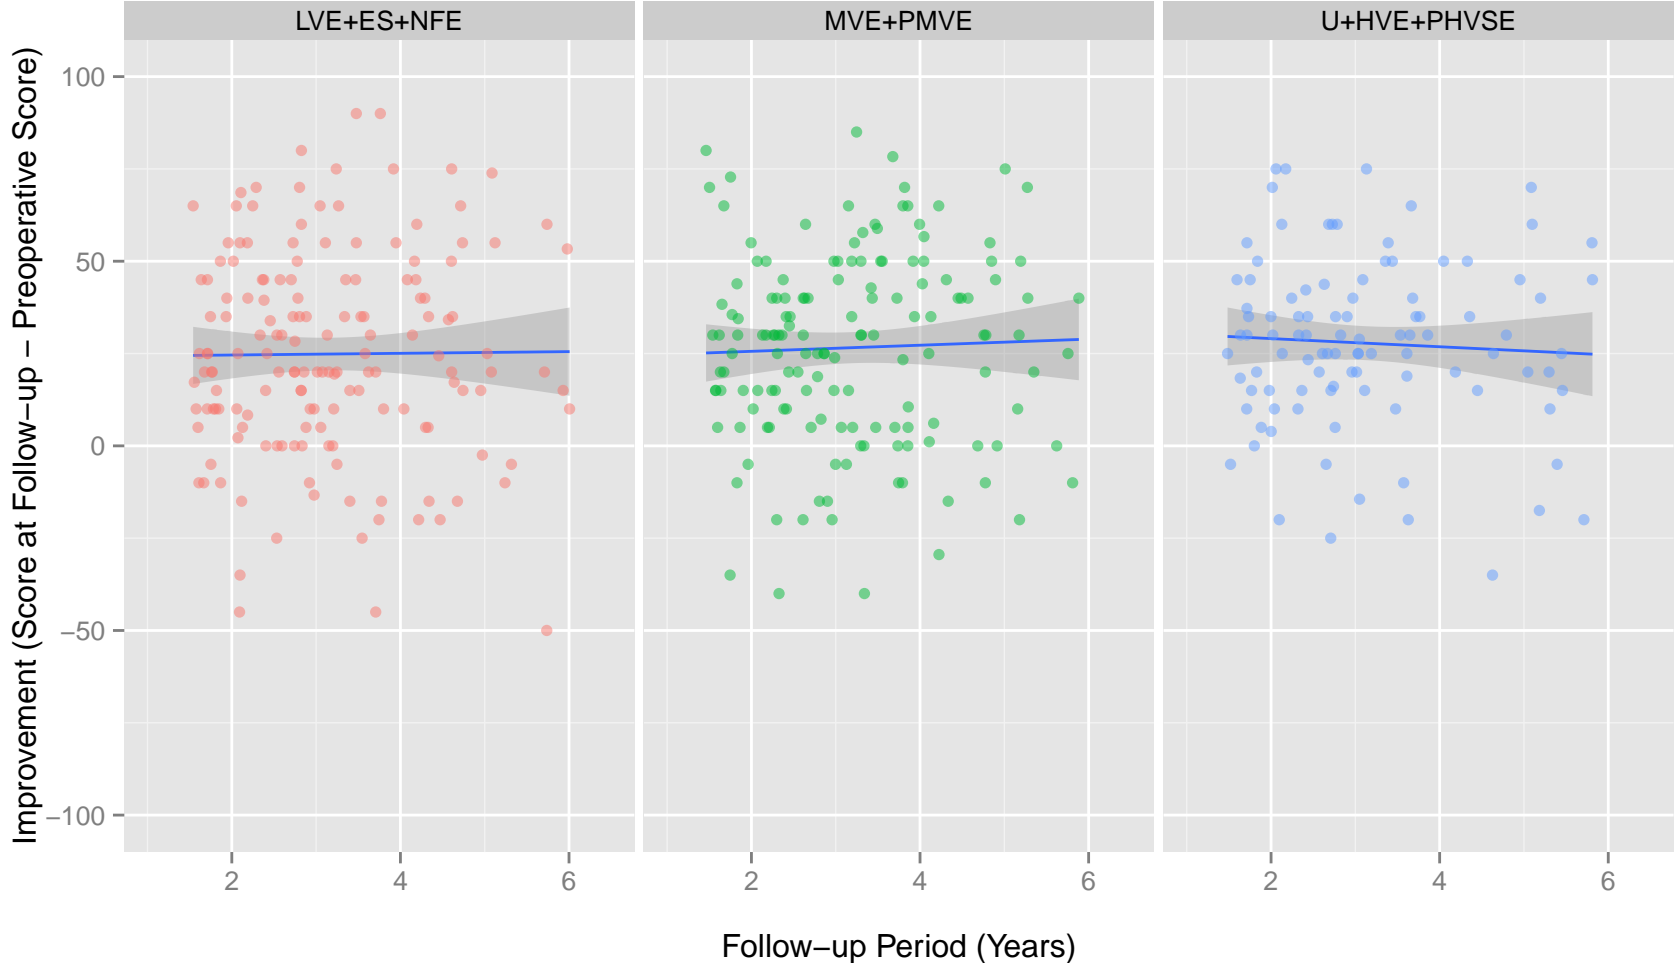

# Improvement in Role-Physical in Time, per Highest Completed Level of Schooling

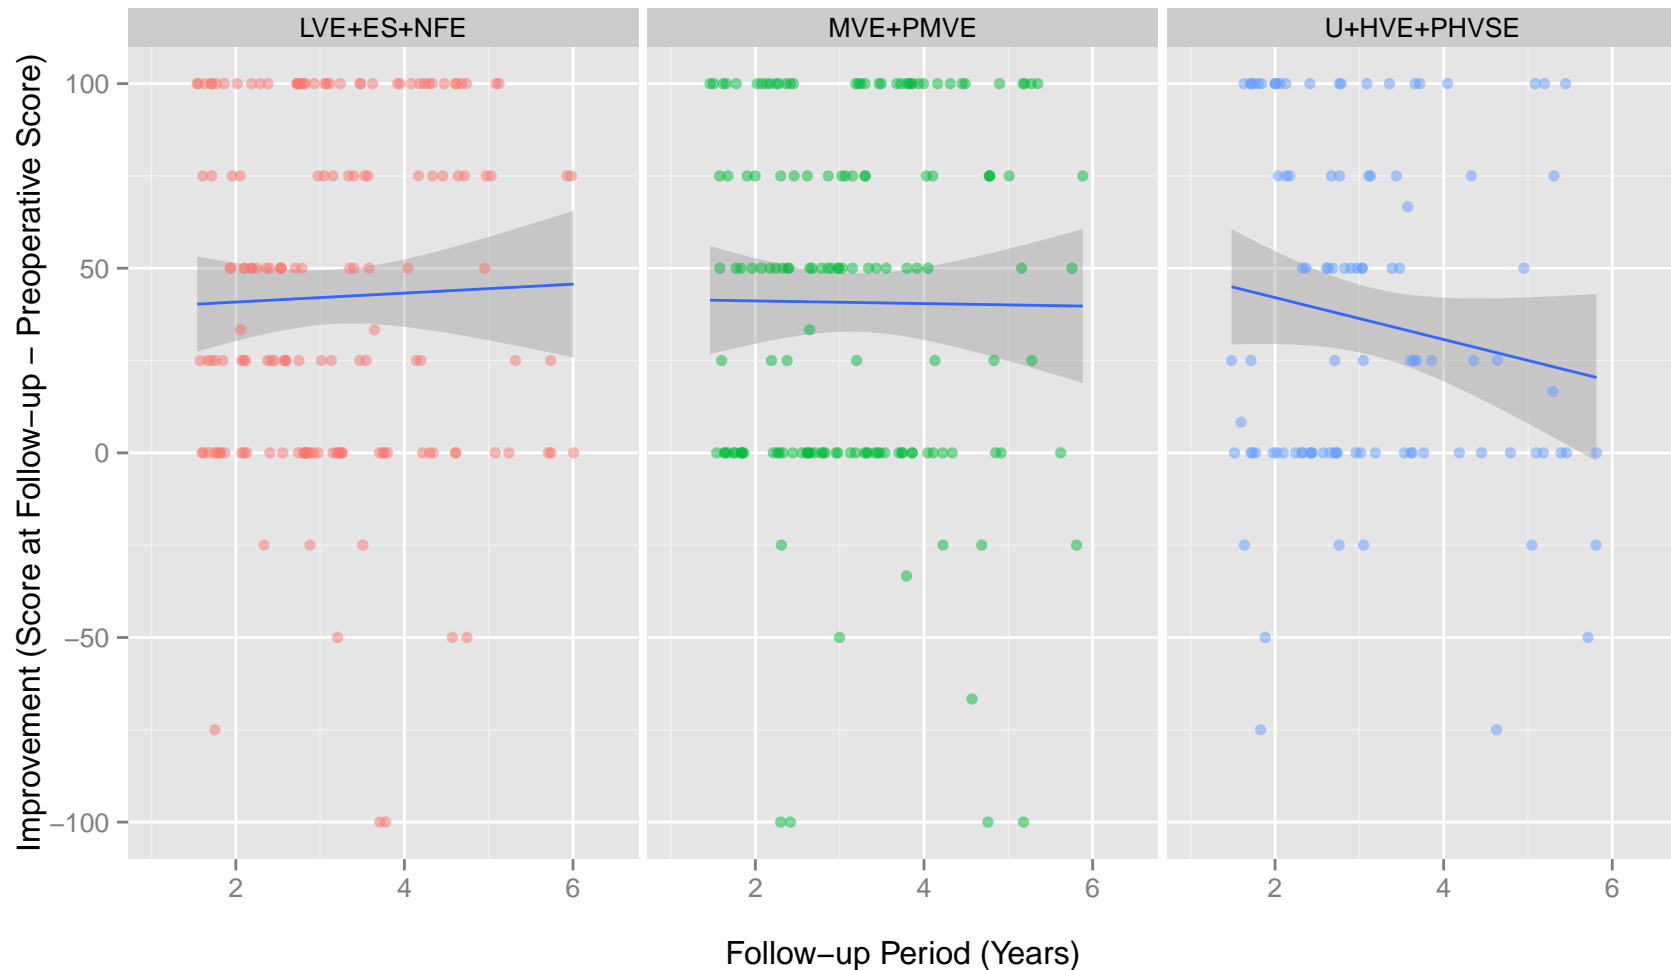

# Improvement in Bodily Pain in Time, per Highest Completed Level of Schooling

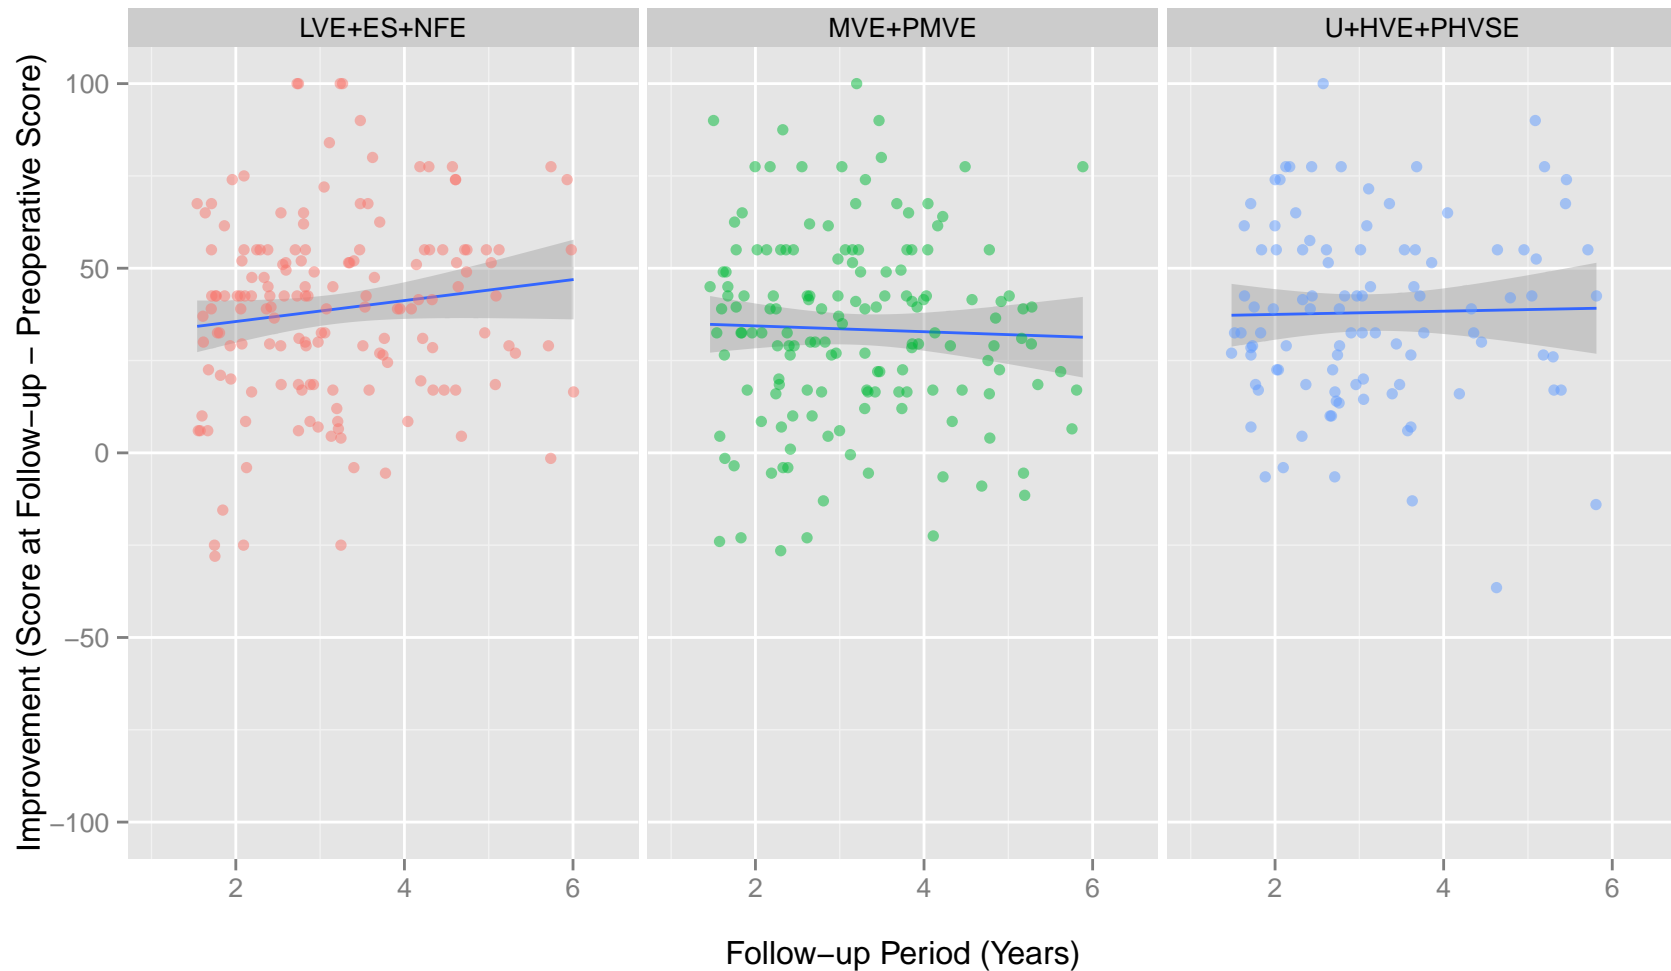

# Improvement in General Health in Time, per Highest Completed Level of Schooling

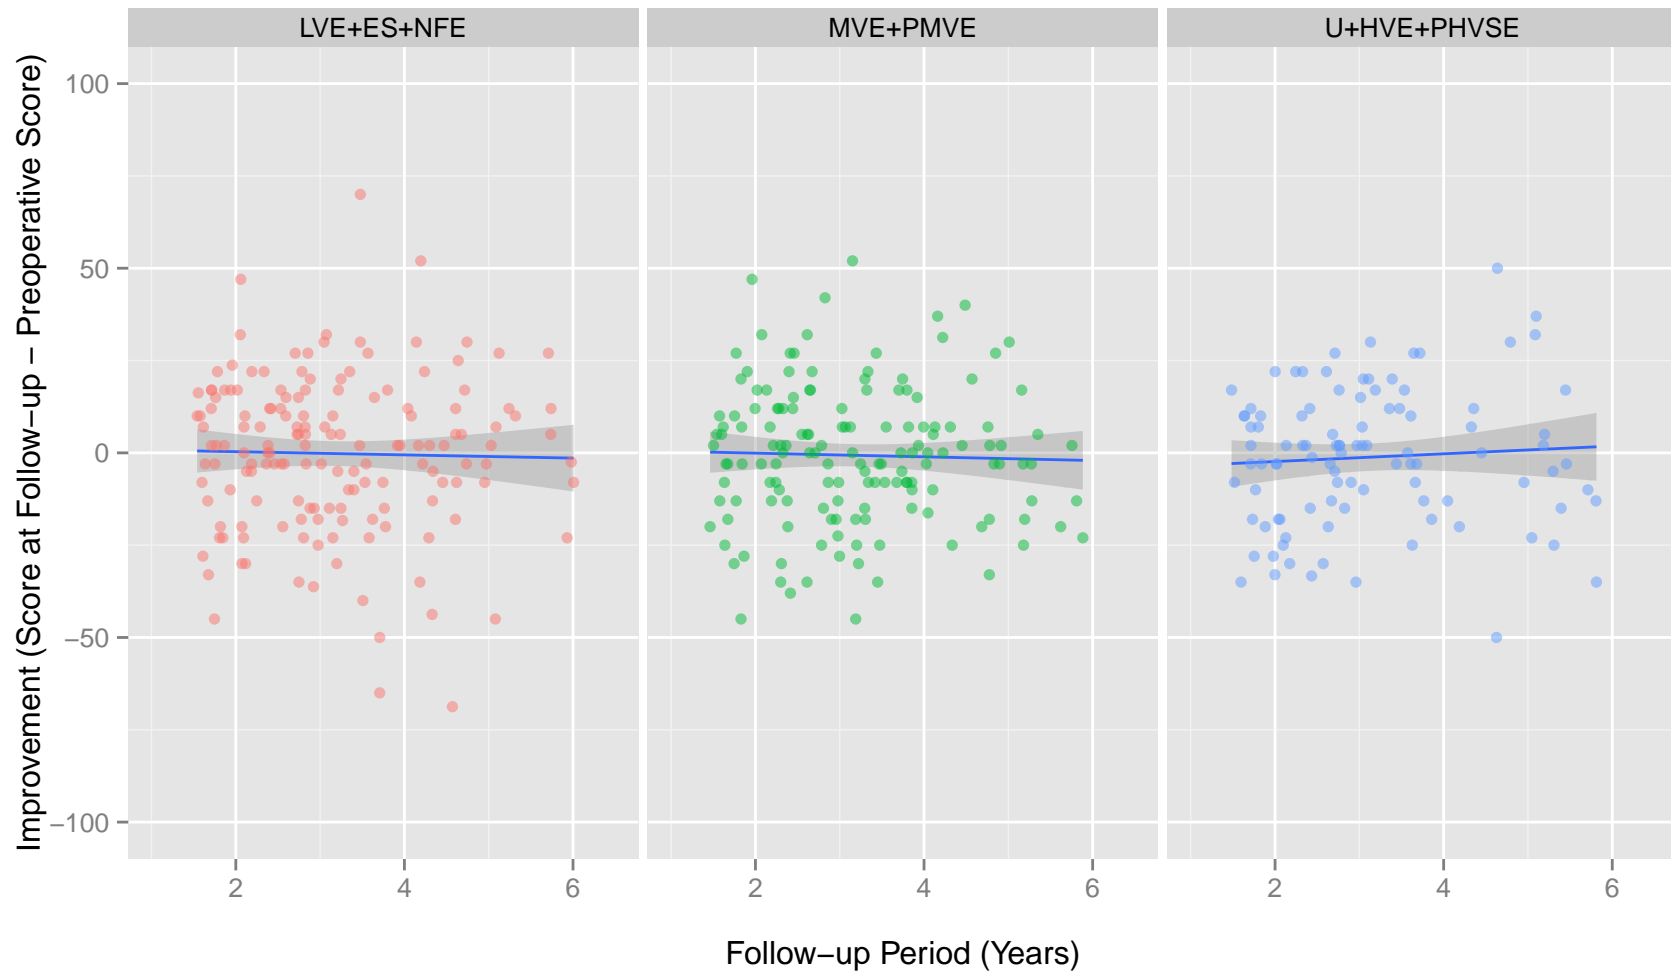

# Improvement in Vitality in Time, per Highest Completed Level of Schooling

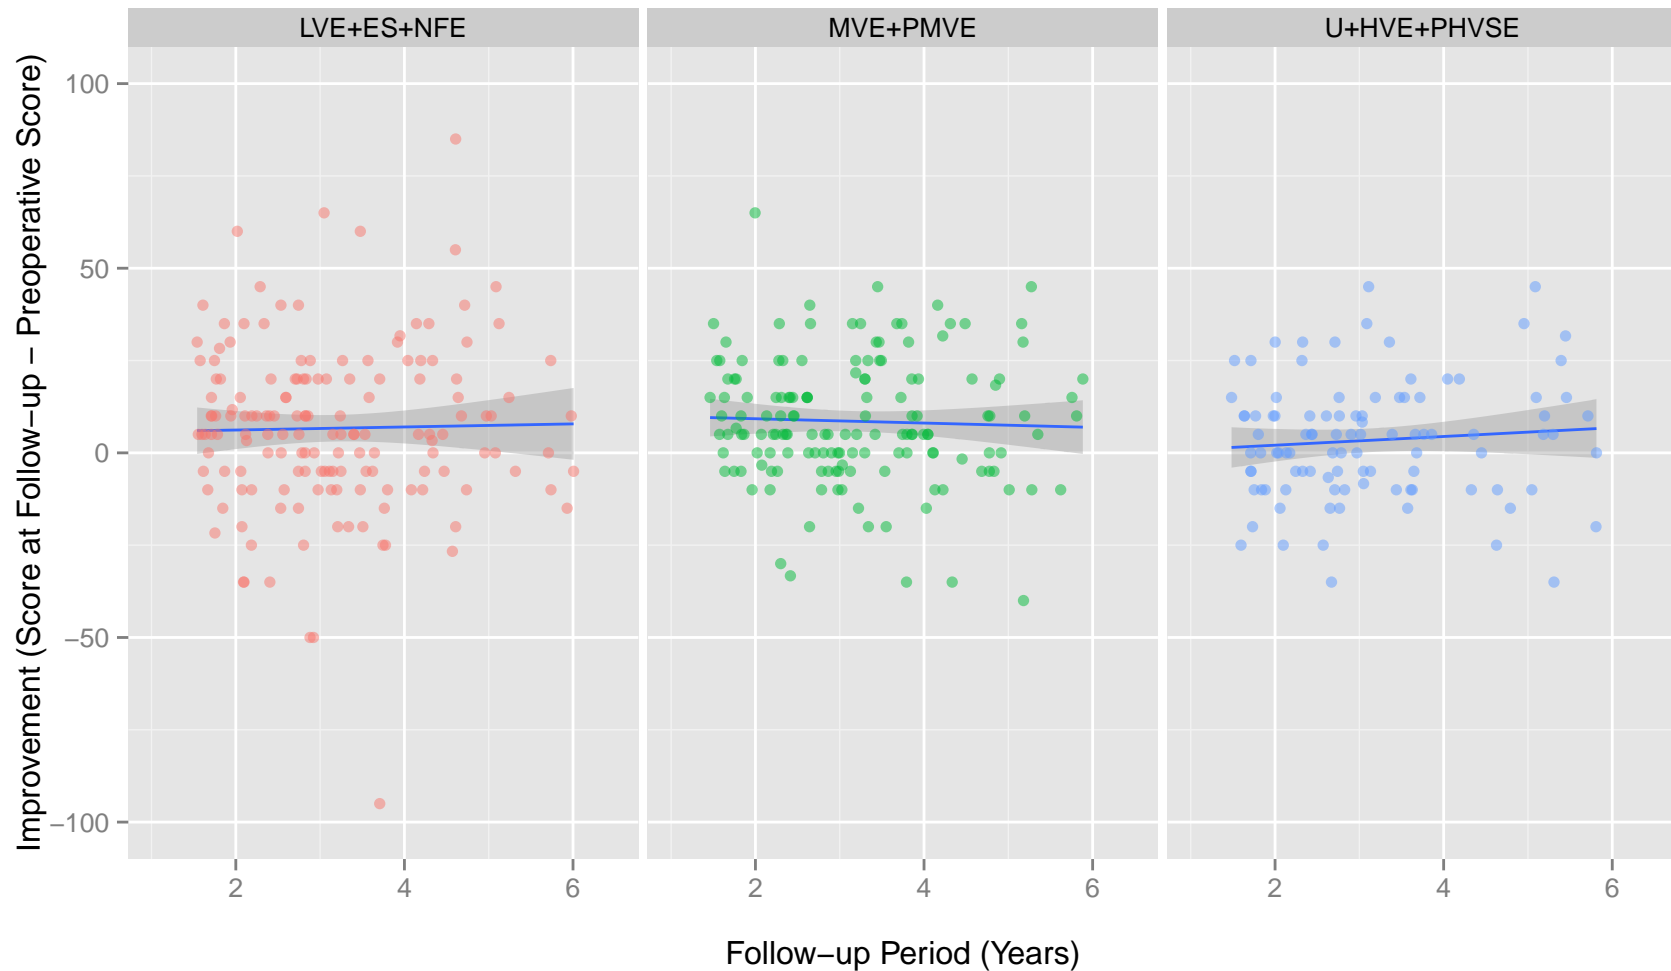

Improvement in Social Functioning in Time,  
per Highest Completed Level of Schooling

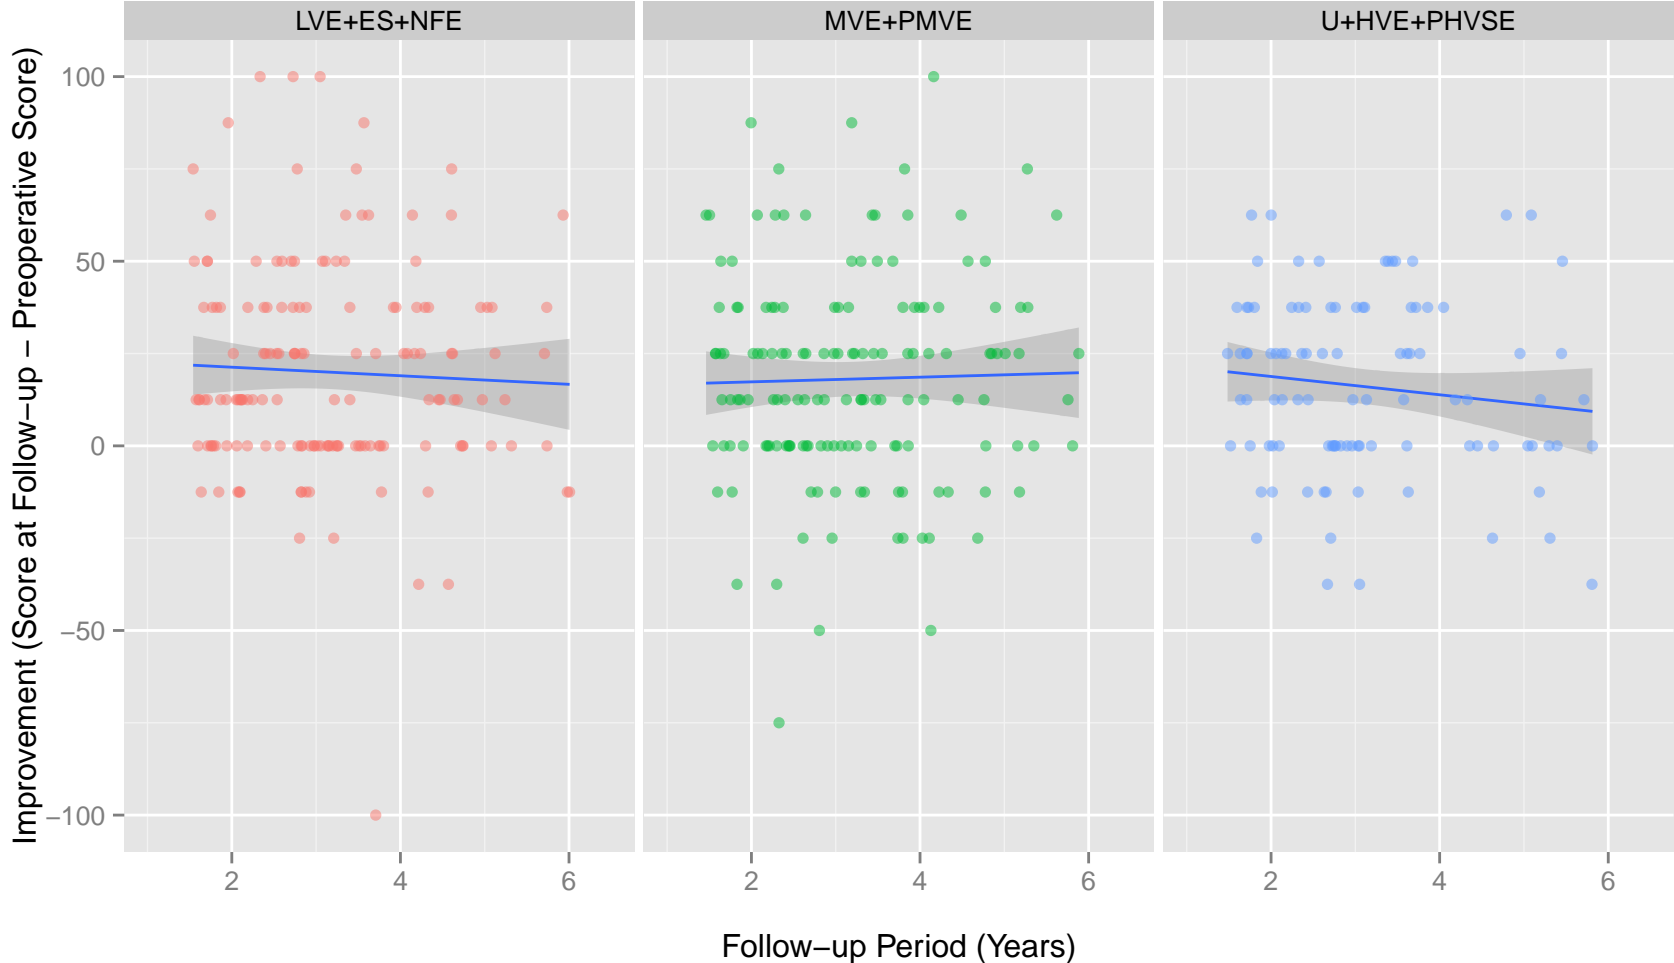

Improvement in Role–Emotional in Time,  
per Highest Completed Level of Schooling

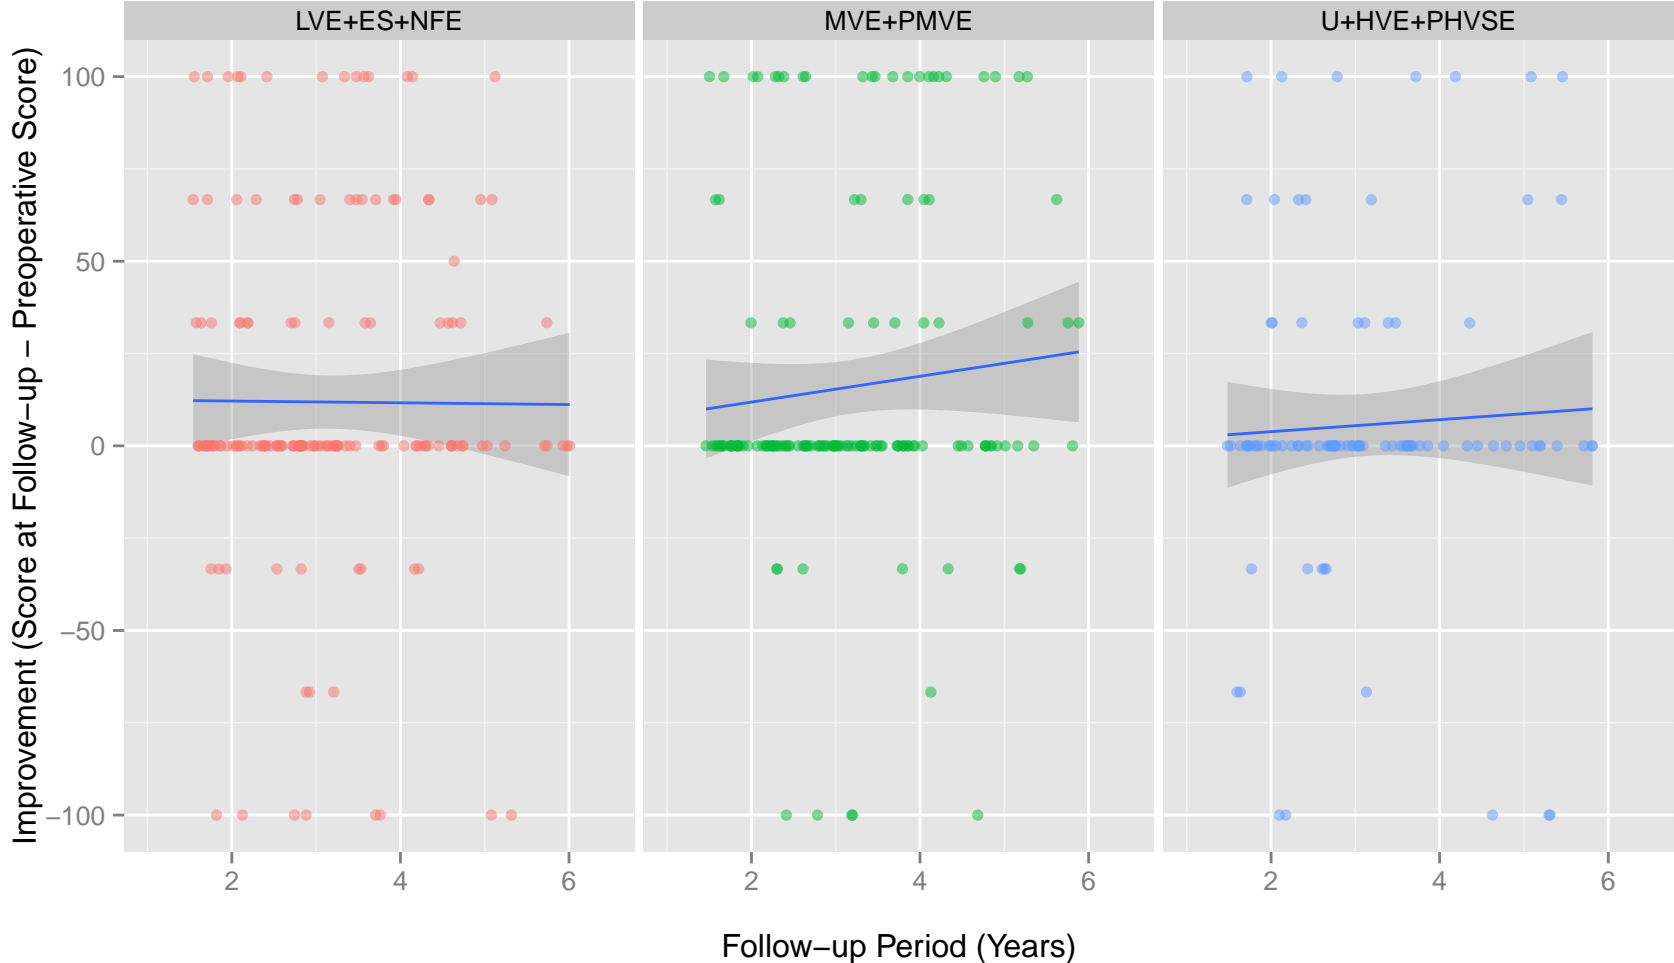

# Improvement in Mental Health in Time, per Highest Completed Level of Schooling

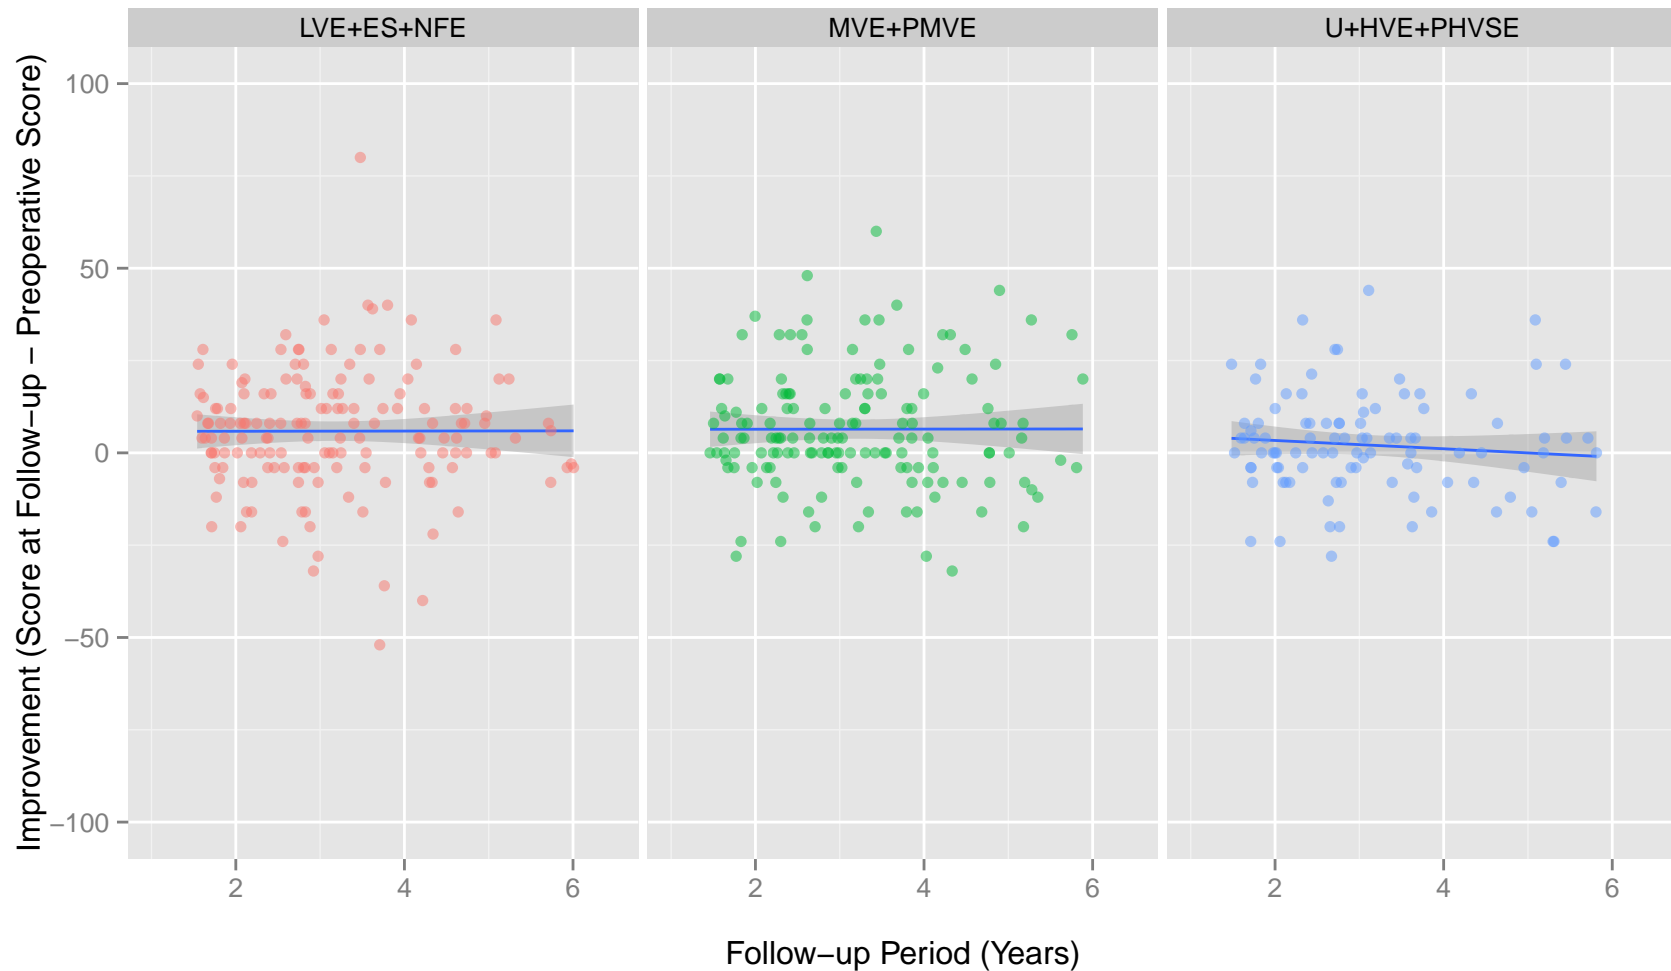



# Improvement in Physical Component Summary in Time, per Highest Completed Level of Schooling

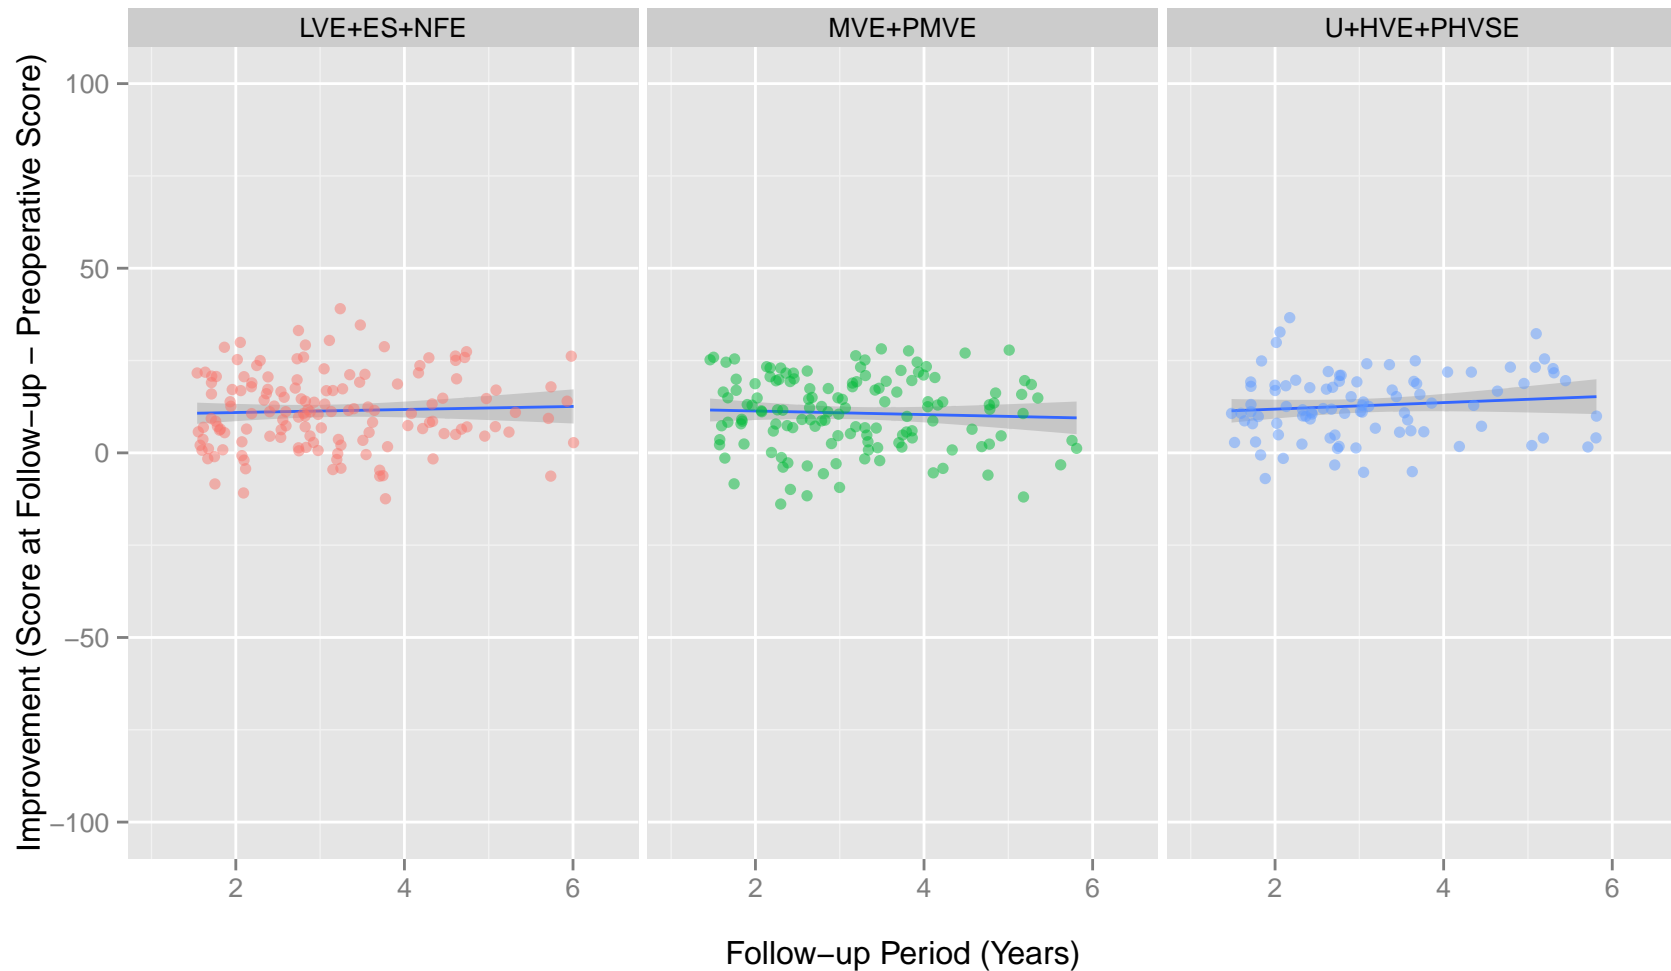

# Improvement in Mental Component Summary in Time, per Highest Completed Level of Schooling

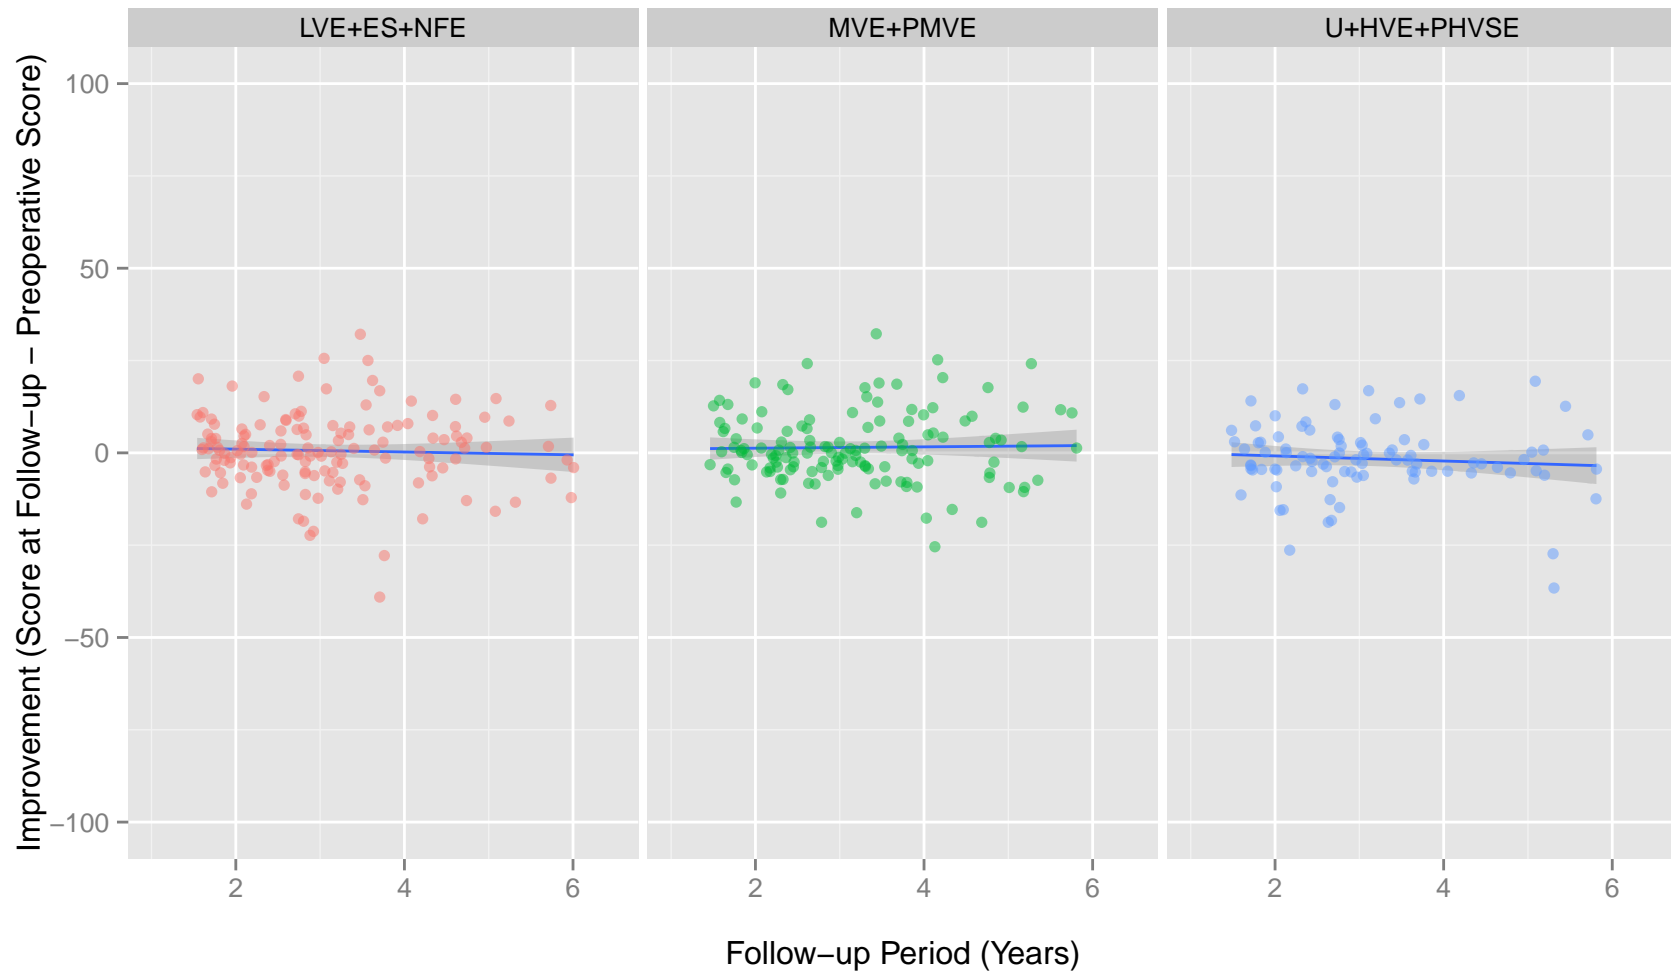

Supplement: S1 (10.1371/journal.pone.0056785.s001) [file journal.pone.0056785.s001]
